# Supplementary material for: Substitution of copper atoms into defect-rich molybdenum sulfides and their electrocatalytic activity
Source: Nanoscale Adv. 2021 Jan 26;3(6):1747–57. doi: 10.1039/d0na01064b (PMC9419841; doi:10.1039/d0na01064b)
Supplement: NA-003-D0NA01064B-s001 [file NA-003-D0NA01064B-s001.pdf]

## Supplementary Information

### Substitution of Copper Atoms into Defect-Rich Molybdenum Sulfide and their Electrocatalytic Activity

*Zixing Wang,<sup>a</sup> Harikishan Kannan,<sup>a</sup> Tonghui Su,<sup>a</sup> Jayashree Swaminathan,<sup>a</sup> Sharmila N. Shirodkar,<sup>a</sup> Francisco C Robles Hernandez,<sup>a,b</sup> Hector Calderon Benavides,<sup>c</sup> Robert Vajtai,<sup>a,d</sup> Boris I. Yakobson,<sup>a</sup> Ashokkumar Meiyazhagan,<sup>\*a</sup> Pulickel M. Ajayan<sup>\*a</sup>*

<sup>a</sup> Department of Materials Science and NanoEngineering, Rice University, Houston, TX 77005, USA.

Email: [ma37@rice.edu](mailto:ma37@rice.edu); [ajayan@rice.edu](mailto:ajayan@rice.edu)

<sup>b</sup> Department of Mechanical Engineering Technology, University of Houston, Houston, Texas 77204-4020, United States

<sup>c</sup> Departamento de Física, ESFM-IPN, Ed. 9, Instituto Politécnico Nacional UPALM, Mexico D.F., Mexico 07738

<sup>d</sup> Interdisciplinary Excellence Centre, Department of Applied and Environmental Chemistry, University of Szeged, Rerrich Béla tér 1, Szeged, H-6720, Hungary

## XPS Studies of MoS<sub>2-x</sub> synthesized using wet chemical approach

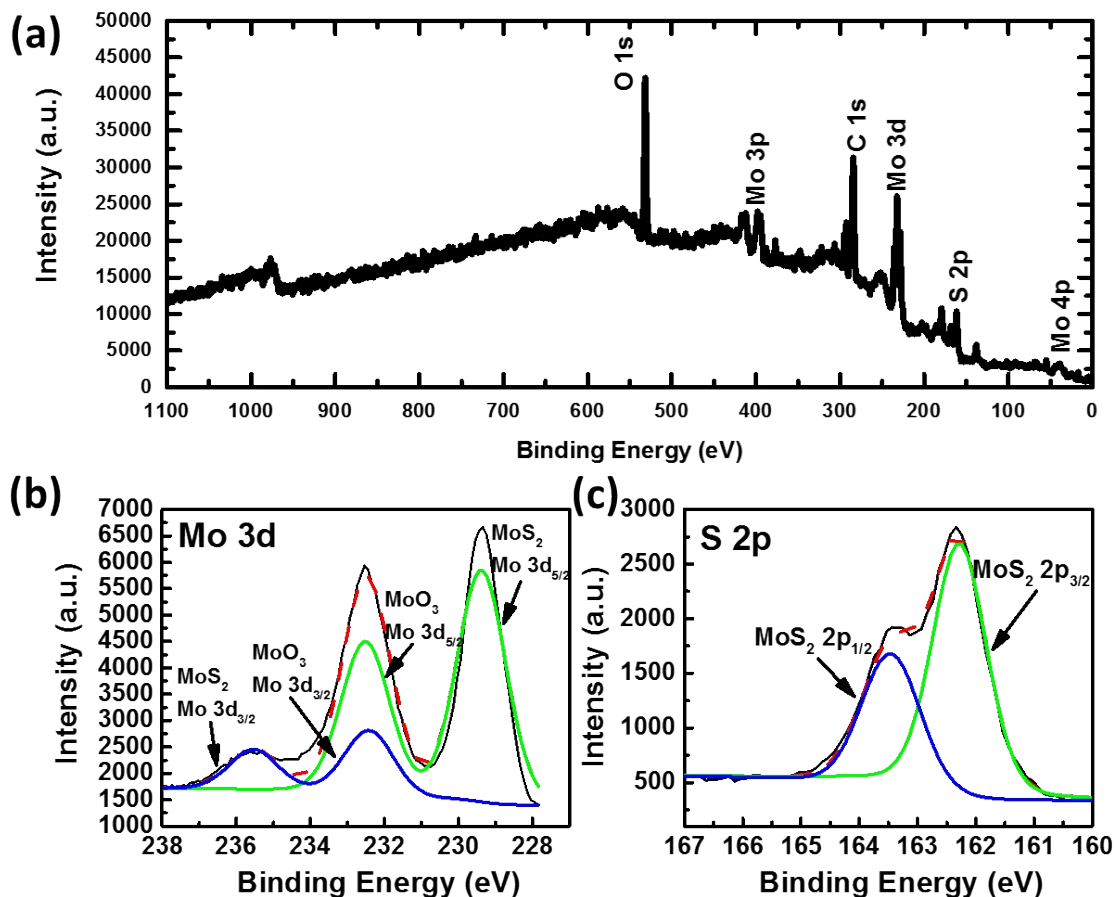

**Figure S1** XPS spectra of colloidal synthesized MoS<sub>2-x</sub> nanoparticles. (a) XPS survey spectra. The product contains 31.2 at% Mo, 37.5 at% S, and 31.2 at% O. (b) Mo 3d spectra of colloidal synthesized MoS<sub>2</sub> nanoparticles. Mo 3d<sub>5/2</sub> peak for MoS<sub>2</sub> and MoO<sub>3</sub> are located at 229.4 eV and 232.4 eV respectively. 78.1 at% of Mo comes from MoS<sub>2</sub> and 21.9 at% Mo comes from MoO<sub>3</sub>. (c) S 2p spectra of colloidal synthesized MoS<sub>2</sub> nanoparticles. The S intensity comes only from MoS<sub>2</sub>, where 2p<sub>3/2</sub> peak is located at 162.3 eV and 2p<sub>1/2</sub> peak is located at 163.5 eV.

## XPS Studies of $\text{MoS}_{1.99}\text{Cu}_{0.01}$ synthesized using wet chemical approach

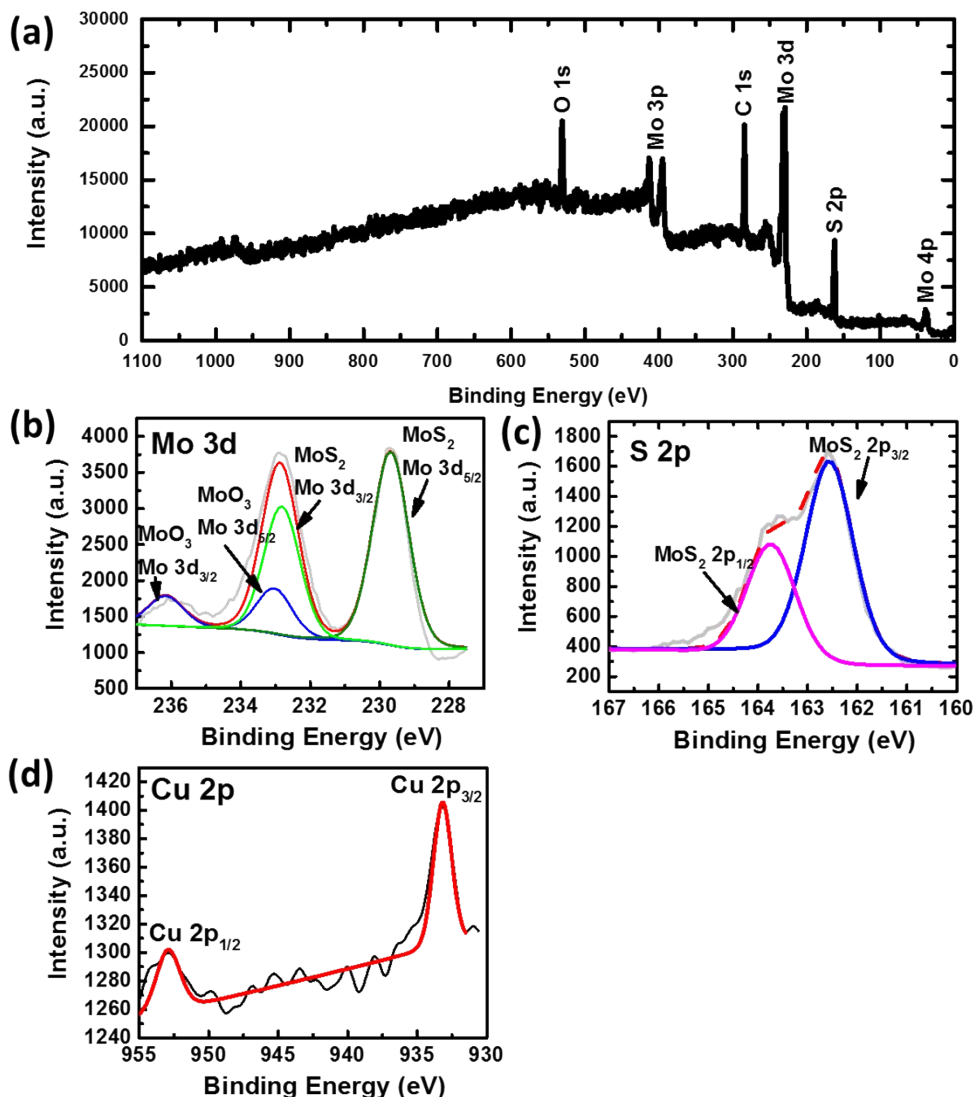

**Figure S2** XPS spectra of  $\text{MoS}_{1.99}\text{Cu}_{0.01}$  with tetrakis(acetonitrile)copper (I) hexafluorophosphate decomposed at 100 °C. (a) XPS survey spectra. The product contains 23.4 at% Mo, 33.7 at% S, 0.6 at% Cu and 42.3 at% O. (b) Mo 3d spectra of. Mo 3d<sub>5/2</sub> peak for MoS<sub>2</sub> and MoO<sub>3</sub> are located at 229.7 eV and 233.0 eV respectively. 61 at% of Mo comes from MoS<sub>2</sub> and 39 at% Mo comes from MoO<sub>3</sub>. (c) S 2p spectra of  $\text{MoS}_{1.99}\text{Cu}_{0.01}$ . The S intensity comes only from MoS<sub>2</sub>, where 2p<sub>3/2</sub> peak is located at 162.6 eV. (d) Cu 2p spectra of  $\text{MoS}_{1.99}\text{Cu}_{0.01}$ . The Cu signals come exclusively from Cu(0) or Cu(I). Since the Cu(0) and Cu(I) XPS peaks are close in position (< 0.1 eV difference in position), it is difficult to distinguish the two materials. The Cu 2p<sub>3/2</sub> peak is located at 933.3 eV.

## XPS Studies of $\text{MoS}_{1.9}\text{Cu}_{0.1}$ synthesized using wet chemical approach

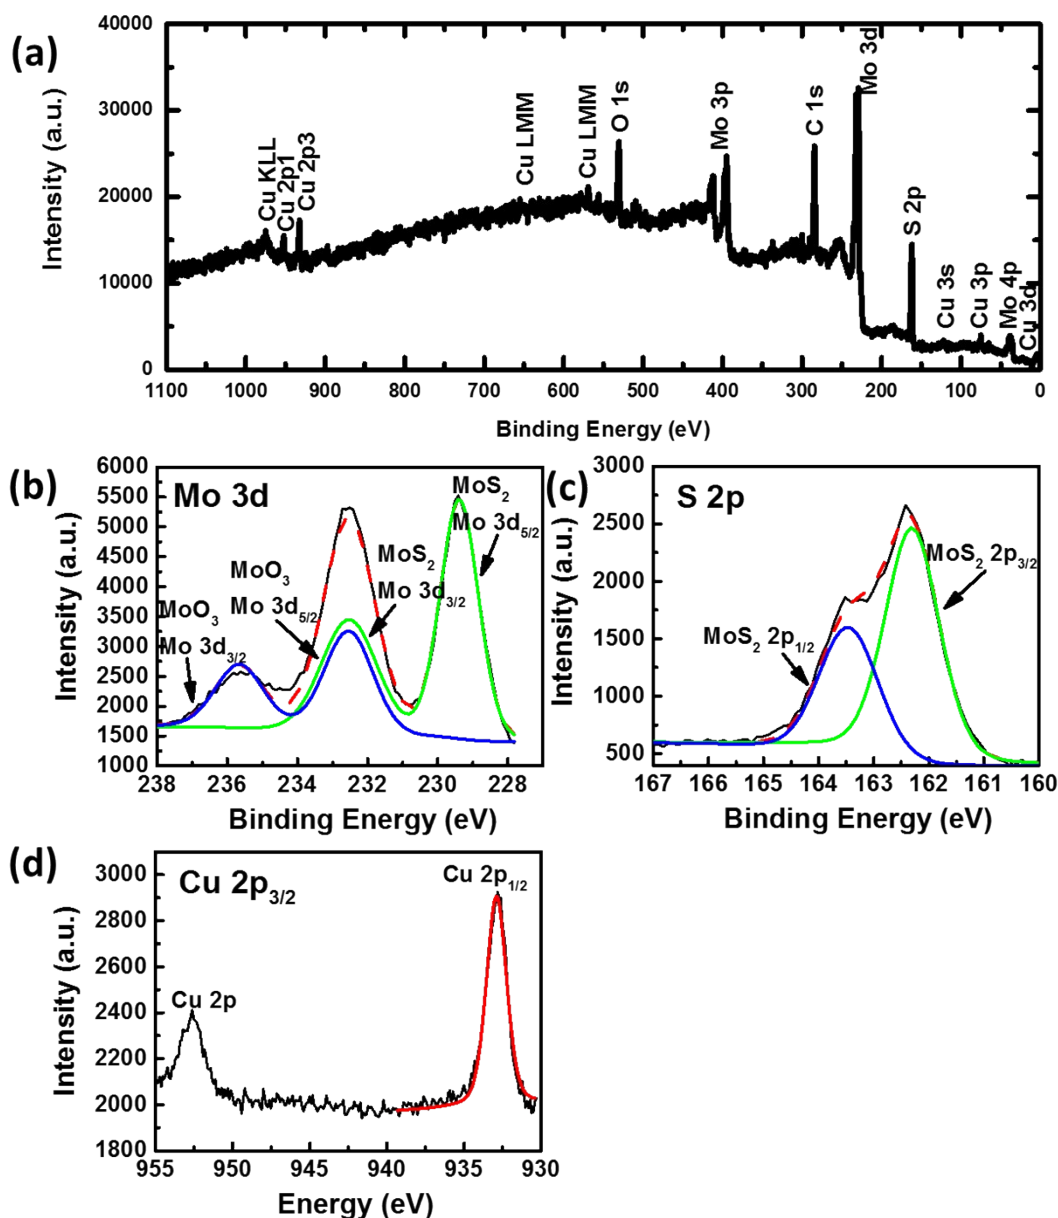

**Figure S3** XPS spectra of  $\text{MoS}_{1.9}\text{Cu}_{0.1}$  with tetrakis(acetonitrile)copper (I) hexafluorophosphate decomposed at 100 °C. (a) XPS survey spectra. The product contains 24.6 at% Mo, 35.6 at% S, 2.8 at% Cu and 37.0 at% O. (b) Mo 3d spectra of  $\text{MoS}_{1.9}\text{Cu}_{0.1}$ . Mo 3d<sub>5/2</sub> peak for MoS<sub>2</sub> and MoO<sub>3</sub> are located at 229.4 eV and 232.4 eV respectively. 82 at% of Mo comes from MoS<sub>2</sub> and 18 at% Mo comes from MoO<sub>3</sub>. (c) S 2p spectra of  $\text{MoS}_{1.9}\text{Cu}_{0.1}$ . The S intensity comes only from MoS<sub>2</sub>, where 2p<sub>3/2</sub> peak is located at 162.3 eV. (d) Cu 2p spectra of  $\text{MoS}_{1.9}\text{Cu}_{0.1}$ . The Cu 2p<sub>3/2</sub> peak for Cu(0) or Cu(I) is located at 932.9 eV.

## XPS Studies of $\text{MoS}_1\text{Cu}_1$ synthesized using wet chemical approach

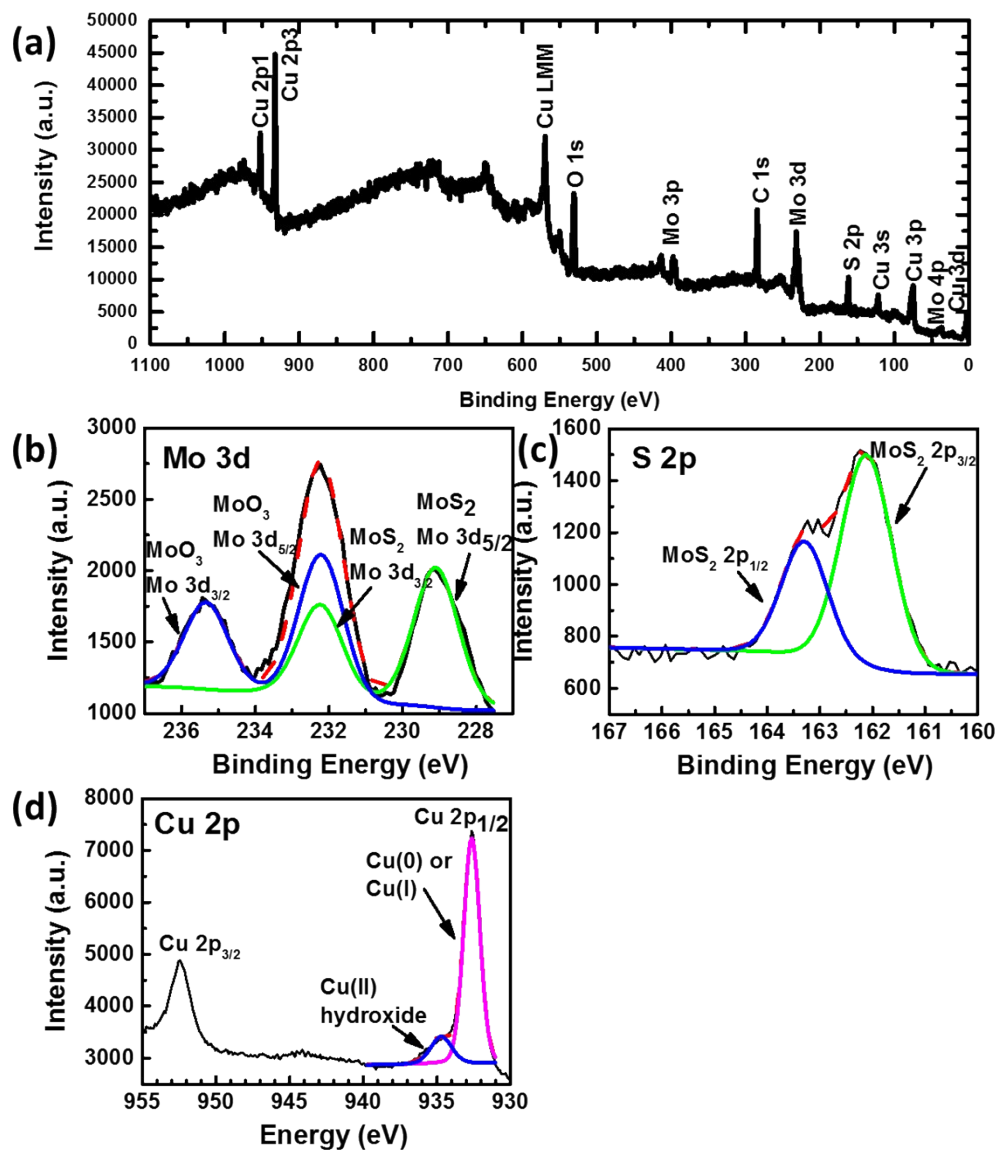

**Figure S4** XPS spectra of colloidal synthesized  $\text{MoS}_1\text{Cu}_1$  with tetrakis(acetonitrile)copper (I) hexafluorophosphate decomposed at 100 °C. (a) XPS survey spectra. The product contains 11.0 at% Mo, 15.7 at% S, 19.8 at% Cu and 53.5 at% O. (b) Mo 3d spectra. Mo  $3d_{5/2}$  peak for  $\text{MoS}_2$  and  $\text{MoO}_3$  are located at 229.1 eV and 232.2 eV respectively. 51 at% of Mo comes from  $\text{MoS}_2$  and 49 at% Mo comes from  $\text{MoO}_3$ . (c) S 2p spectra of  $\text{MoSCu}$ . The S intensity comes only from  $\text{MoS}_2$ , where  $2p_{3/2}$  peak is located at 162.1 eV. (d) Cu 2p spectra of  $\text{MoSCu}$ . The Cu signals come from Cu(0) or Cu(I), and Cu(II) hydroxide. The Cu  $2p_{3/2}$  peak for Cu(0) or Cu(I) is located at 932.6 eV

and for Cu(II) hydroxide is located at 934.7 eV. The Cu contains 86 at% Cu(0) or Cu(I) and 14 at% Cu(II) hydroxide.

### XPS Studies of $\text{MoS}_1\text{Cu}_1$ synthesized using wet chemical approach

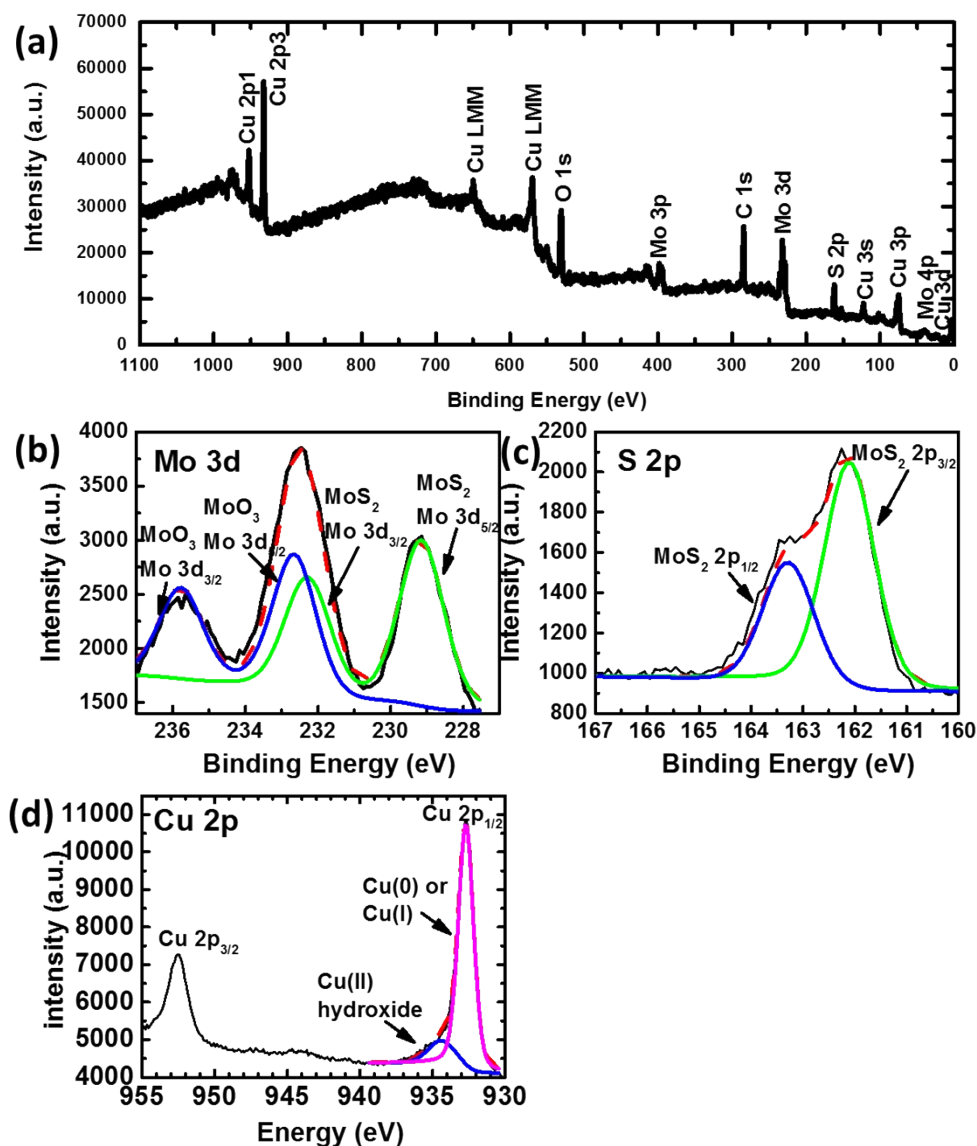

**Figure S5** XPS spectra of colloidal synthesized  $\text{MoS}_1\text{Cu}_1$  with tetrakis(acetonitrile)copper (I) hexafluorophosphate decomposed at 200 °C. (a) XPS survey spectra. The product contains 12.1 at% Mo, 16.3 at% S, 18.6 at% Cu and 53.0 at% O. (b) Mo 3d spectra of  $\text{MoS}_1\text{Cu}_1$ . Mo  $3d_{5/2}$  peak for  $\text{MoS}_2$  and  $\text{MoO}_3$  are located at 229.2 eV and 232.6 eV respectively. 56 at% of Mo comes from  $\text{MoS}_2$  and 44 at% Mo comes from  $\text{MoO}_3$ . (c) S2p spectra of  $\text{MoS}_1\text{Cu}_1$ . The S intensity is due to

MoS<sub>2</sub>, where 2p<sub>3/2</sub> peak is located at 162.2 eV. (d) Cu 2p spectra. The Cu signals display Cu(0) or Cu(I), and Cu(II) hydroxide. The Cu 2p<sub>3/2</sub> peak for Cu(0) or Cu(I) is located at 933.3 eV and Cu(II) hydroxide is located at 935.5 eV. The Cu contains 76 at% Cu(0) or Cu(I) and 24 at% Cu(II) hydroxide.

#### TEM observation of the MoS<sub>1.99</sub>-Cu<sub>0.01</sub>

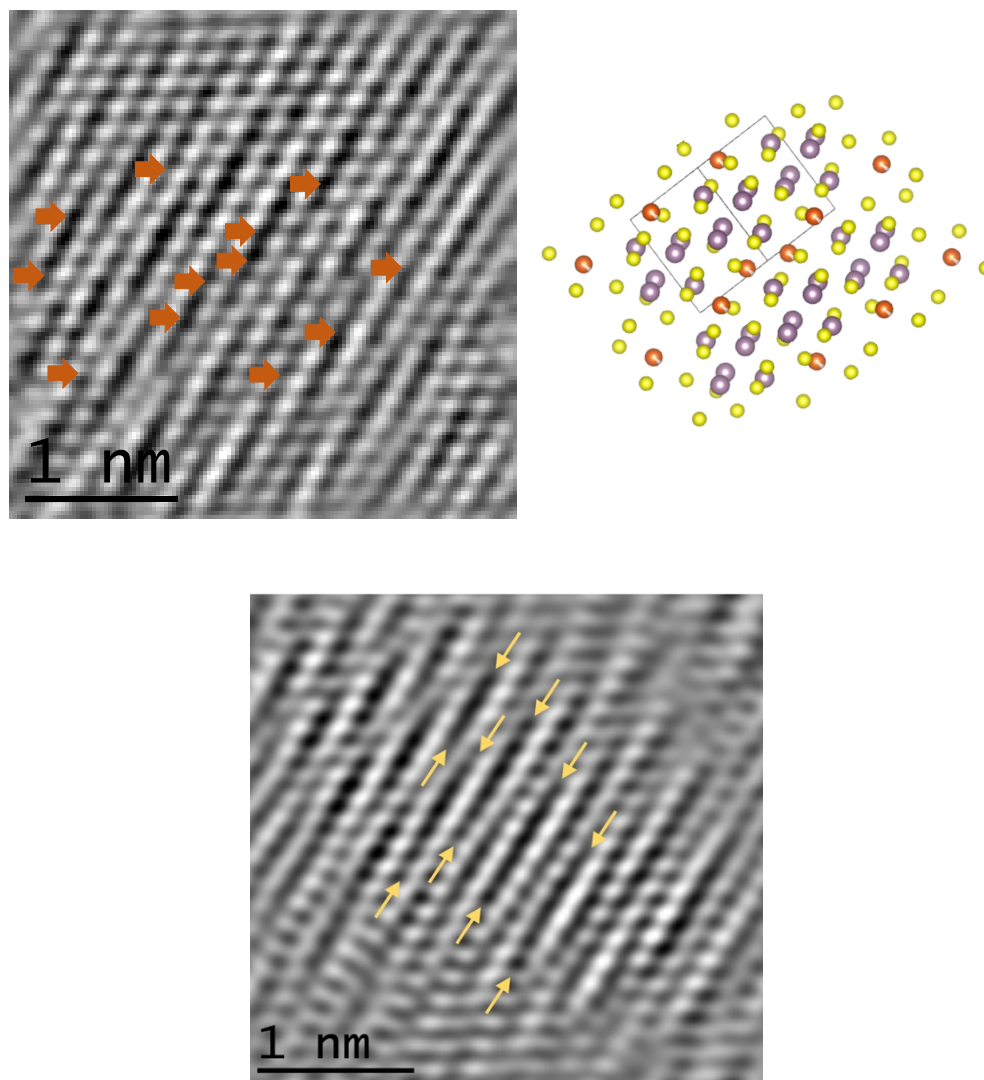

**Figure S6** TEM observation of the MoS<sub>1.99</sub>-Cu<sub>0.01</sub>. Scheme: S (yellow), Mo (purple), Cu (orange) showing spaces in between the layers. The observed gaps are due to the presence of copper atoms.

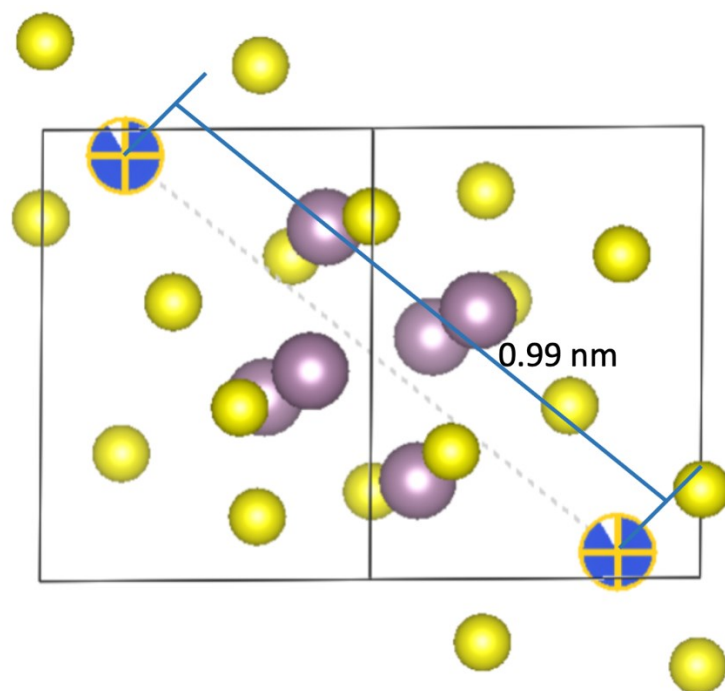

**Figure S7** The measured distance between the Cu atoms is approximately 0.994 nm.

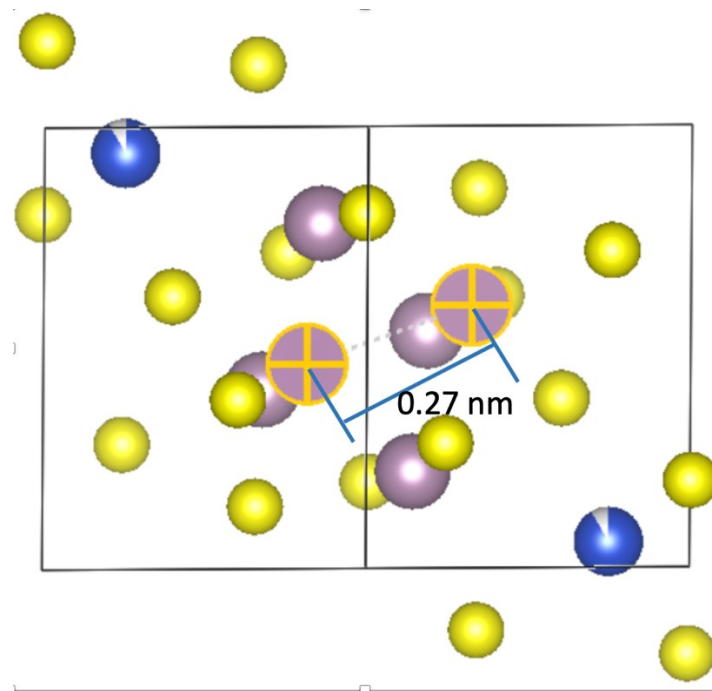

**Figure S8** The measured Mo-S-Mo atoms is approximately 0.27 nm.

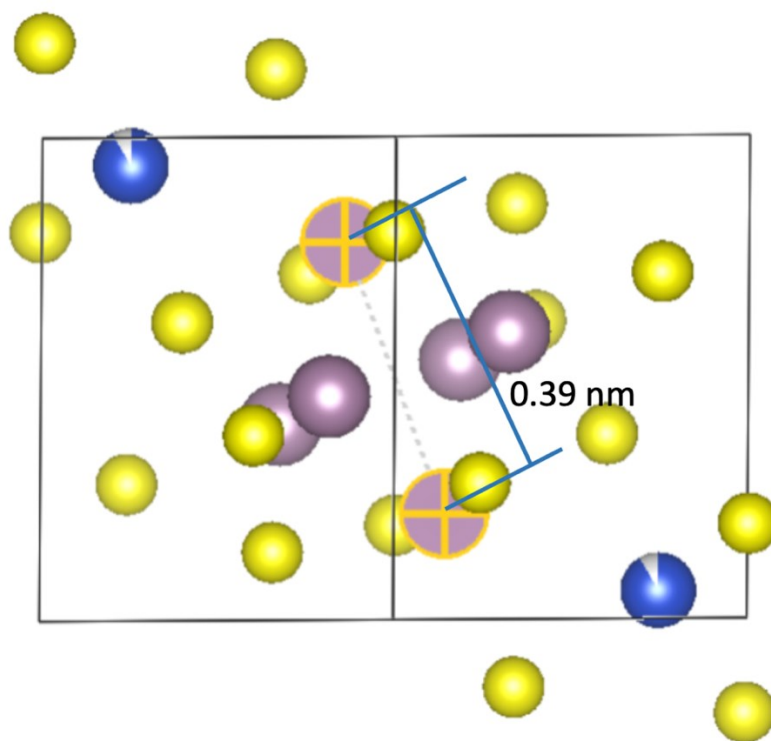

**Figure S9** The measured S-Mo-S atoms is approximately 0.39 nm.

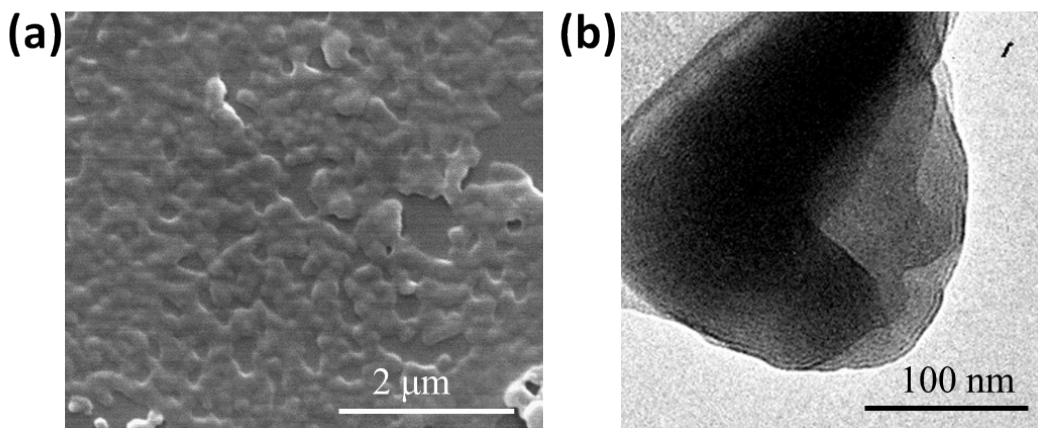

**Figure S10** (a) SEM image of the  $\text{MoS}_{1.99}\text{Cu}_{0.01}$  on Si wafer. A continuous thin layer of sheets can be observed. (b) TEM image of  $\text{MoS}_{1.99}\text{Cu}_{0.01}$  displaying layered crystalline structure at the edges of the cluster.

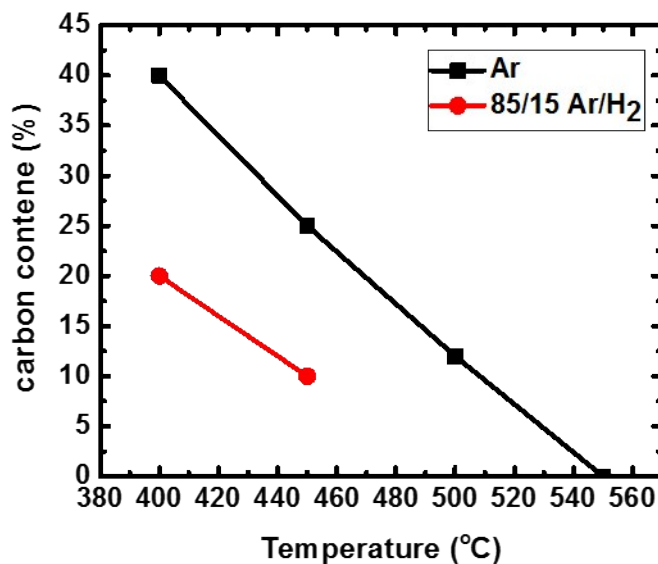

**Figure S11** carbon content in the Cu doped  $\text{MoS}_2$  samples when annealed in either Ar or 85/15 vol/vol Ar/H<sub>2</sub> atmosphere at temperatures ranging from 400 °C to 550 °C for 30 mins. The carbon content is determined by EDS. Ar/H<sub>2</sub> is more effective in removing the carbon from the sample. However, caution should be taken since the H<sub>2</sub> will reduce  $\text{MoS}_2$  nanosheets and produce defects in the material. All carbon content can be removed at 550 °C under Ar atmosphere.

# Effect of temperature and increase in proportion of copper precursor in formation of $\text{MoS}_{1.99}\text{Cu}_{0.01}$

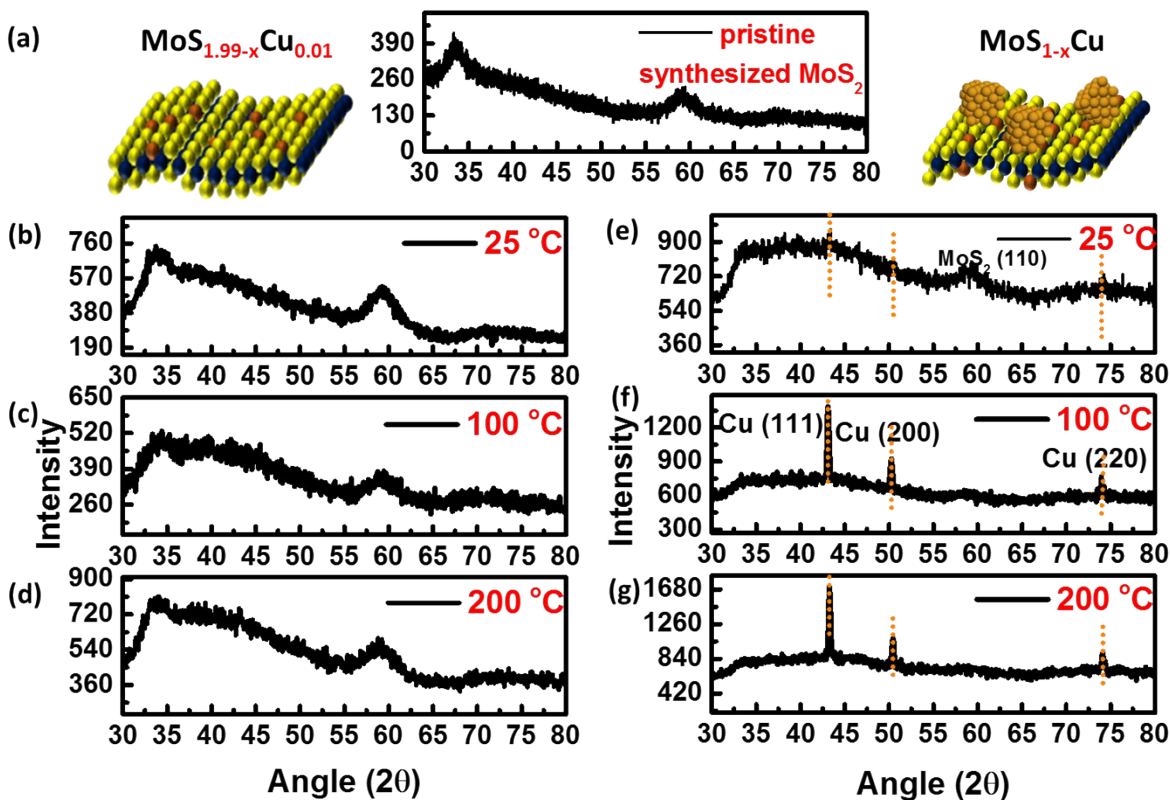

**Figure S12** XRD spectra of (a) colloidal synthesized  $\text{MoS}_2$ . Left inset: cartoon of expected structure of  $\text{MoS}_{1.99}\text{Cu}_{0.01}$ . Right inset: cartoon of expected structure of  $\text{MoS}_{1.99}\text{Cu}$ . (b – d)  $\text{MoS}_{1.99}\text{Cu}_{0.01}$  with tetrakis(acetonitrile)copper (I) hexafluorophosphate decomposed at (b) 25 °C, (c) 100 °C, and (d) 200 °C. The faint peak observed at 43.25° corresponds to the prominent peak of Cu crystal. However, due to low Cu concentration, the Cu XRD peaks are faint. (e – g)  $\text{MoS}_{1-x}\text{Cu}$  with tetrakis(acetonitrile)copper (I) hexafluorophosphate decomposed at (e) 25 °C, (f) 100 °C, and (g) 200 °C.

Distinct peaks of Cu crystal observed from samples synthesized at 100 °C, and 200 °C imply an optimal tetrakis(acetonitrile)copper (I) hexafluorophosphate decomposition temperature between 100-200 °C. The sharp peaks of Cu (marked by orange dashed lines, PDF # 00-026-1116) indicate the Cu crystals in the sample are highly crystalline, making the  $\text{MoS}_2$  nanostructures faint in comparison.

### Reaction pathway for synthesis of Cu doped $\text{MoS}_x$

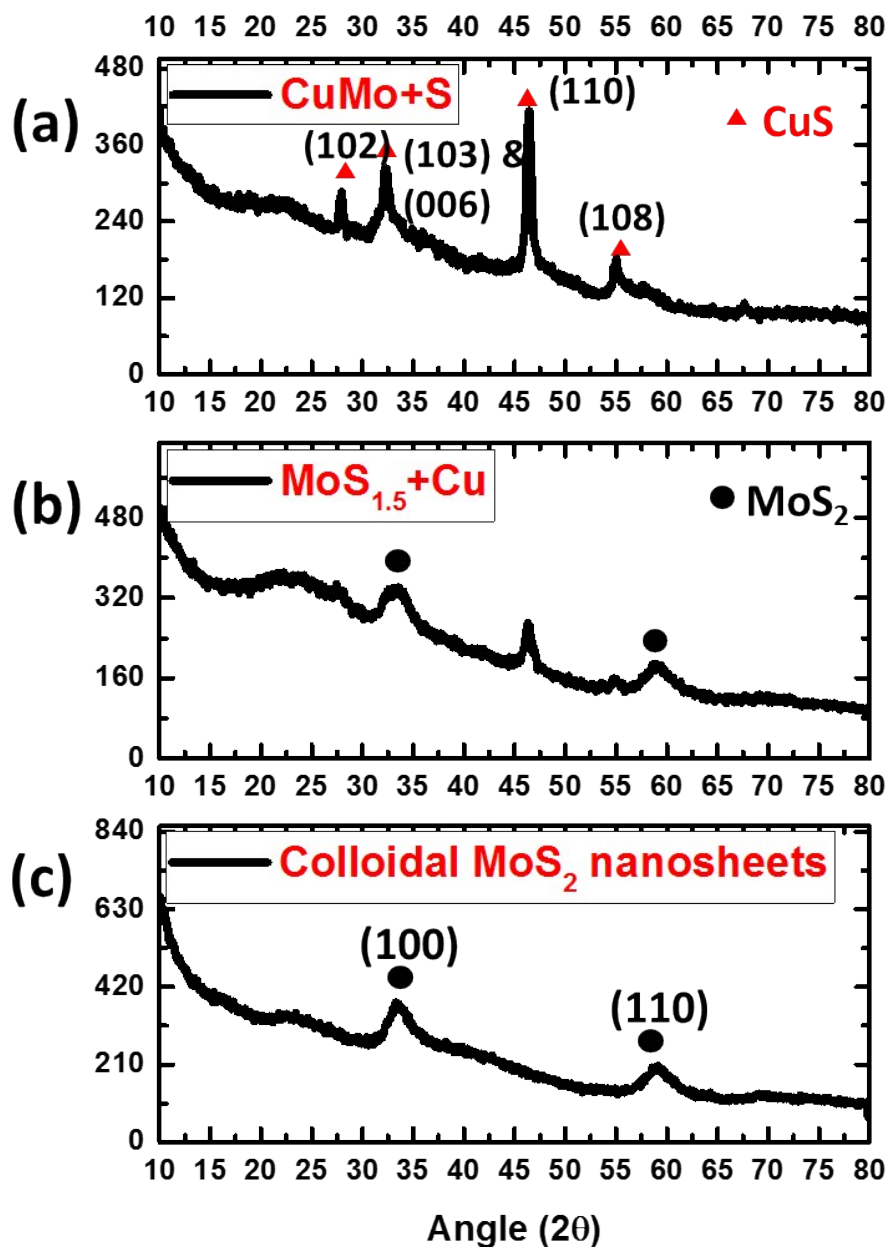

**Figure S13** XRD spectra of Cu, Mo, S synthesized under different conditions at 300 °C. (a) tetrakis(acetonitrile)copper (I) hexafluorophosphate was added to Mo-OAM at 1:1 molar ratio at 150 °C and reacted for 30 minutes. Then S-ODE was added to Cu, Mo-OAM solution and reacted at 300 °C. Distinct CuS peaks are observed from the spectra. This indicates a kinetically favored reaction between Cu and S to form CuS than  $\text{MoS}_2$ . Thus, it is necessary to create a stable  $\text{MoS}_2$  structure before Cu can be added to the reaction. (b) A 1 mole of tetrakis(acetonitrile)copper (I) hexafluorophosphate was added to synthesize 1 mol of  $\text{MoS}_{1.5}$  at 300°C. Other than the spectra

from MoS<sub>2</sub> nanoparticles, peaks corresponding to CuS is also observed, signifying, the thermal activation energy is sufficient to form CuS compound at 300 °C. (c) XRD spectra corresponding to MoS<sub>2-x</sub> nanosheets synthesized through colloidal synthesis.

#### Raman studies of MoS<sub>1.99</sub>Cu<sub>0.01</sub> synthesized at different temperature

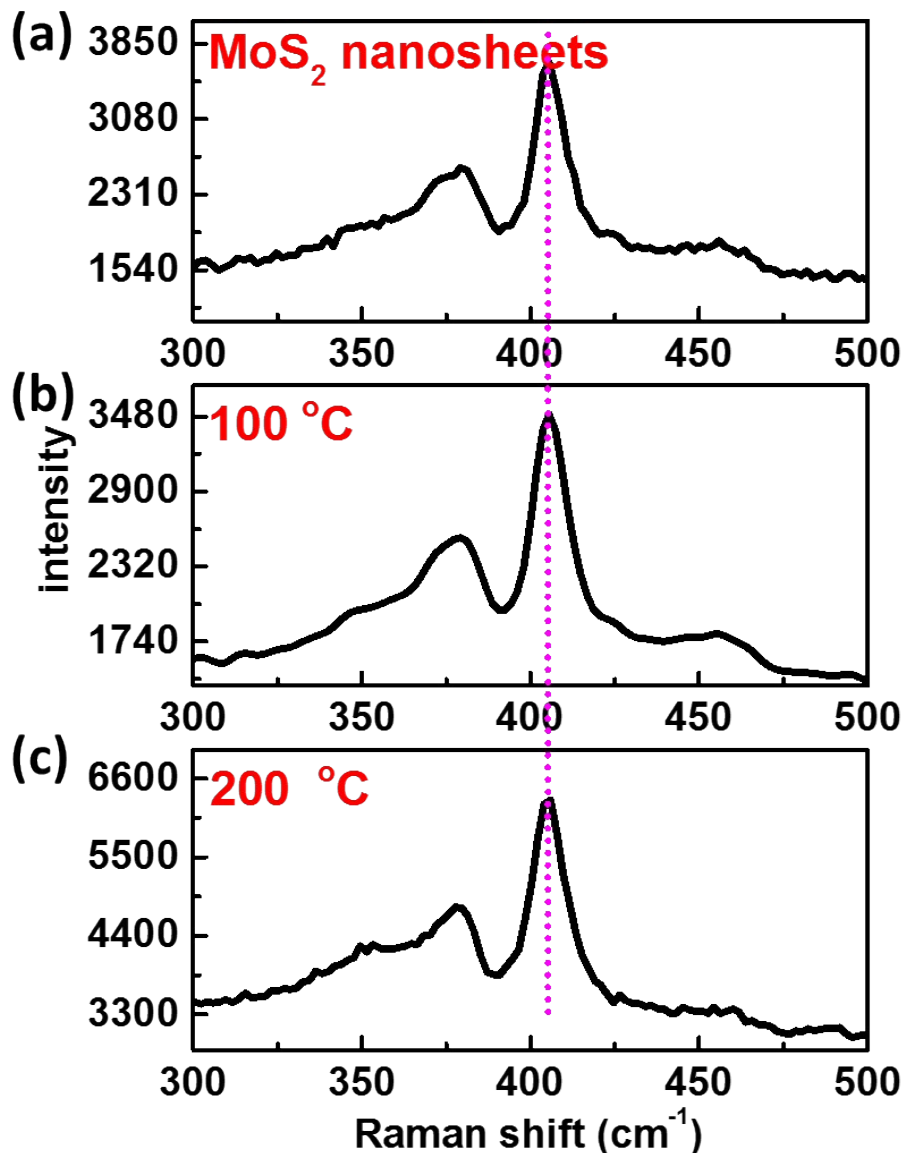

**Figure S14** Raman spectra of (a) colloidal synthesized MoS<sub>2-x</sub> and (b-c) MoS<sub>1.99</sub>Cu<sub>0.01</sub> with tetrakis(acetonitrile)copper (I) hexafluorophosphate decomposed at (b) 100 °C, and (c) 200 °C. The A<sub>1</sub>g peak from (a), (b), and (c) are seen at 405.82, 405.80, and 405.74 cm<sup>-1</sup> respectively.

Raman studies of  $\text{MoS}_{1.9}\text{Cu}_{0.1}$  synthesized at different temperature

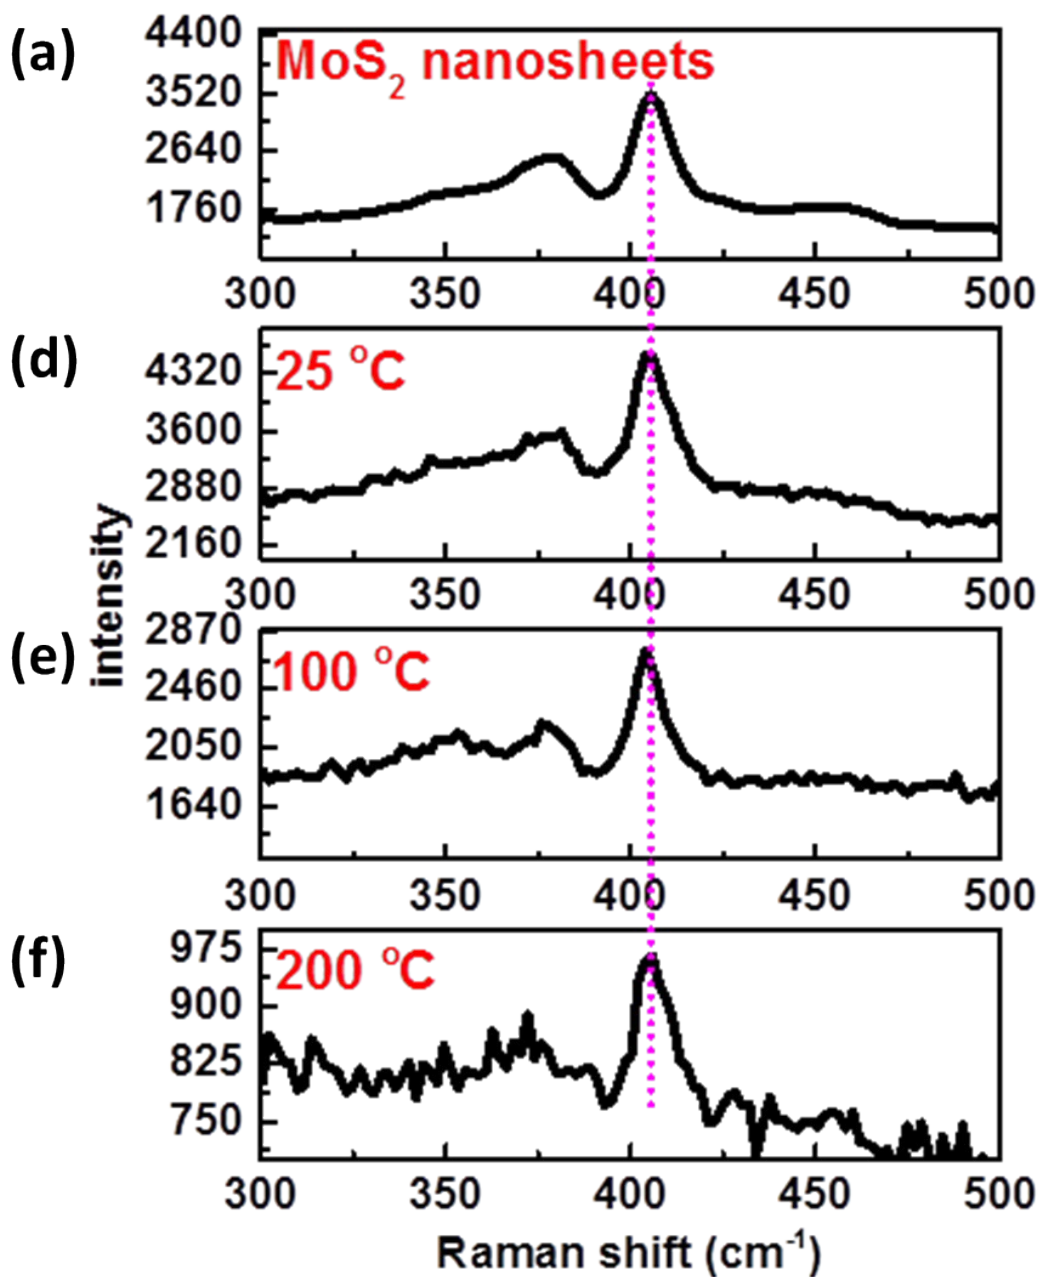

**Figure S15** Raman spectra of (a) colloidal synthesized  $\text{MoS}_{2-x}$  and (b-d)  $\text{MoS}_{1.9}\text{Cu}_{0.1}$  with tetrakis(acetonitrile)copper (I) hexafluorophosphate decomposed at (b) 25 °C, (c) 100 °C, and (d) 200 °C.

# Raman studies of $\text{MoS}_1\text{Cu}_1$ synthesized at different temperature

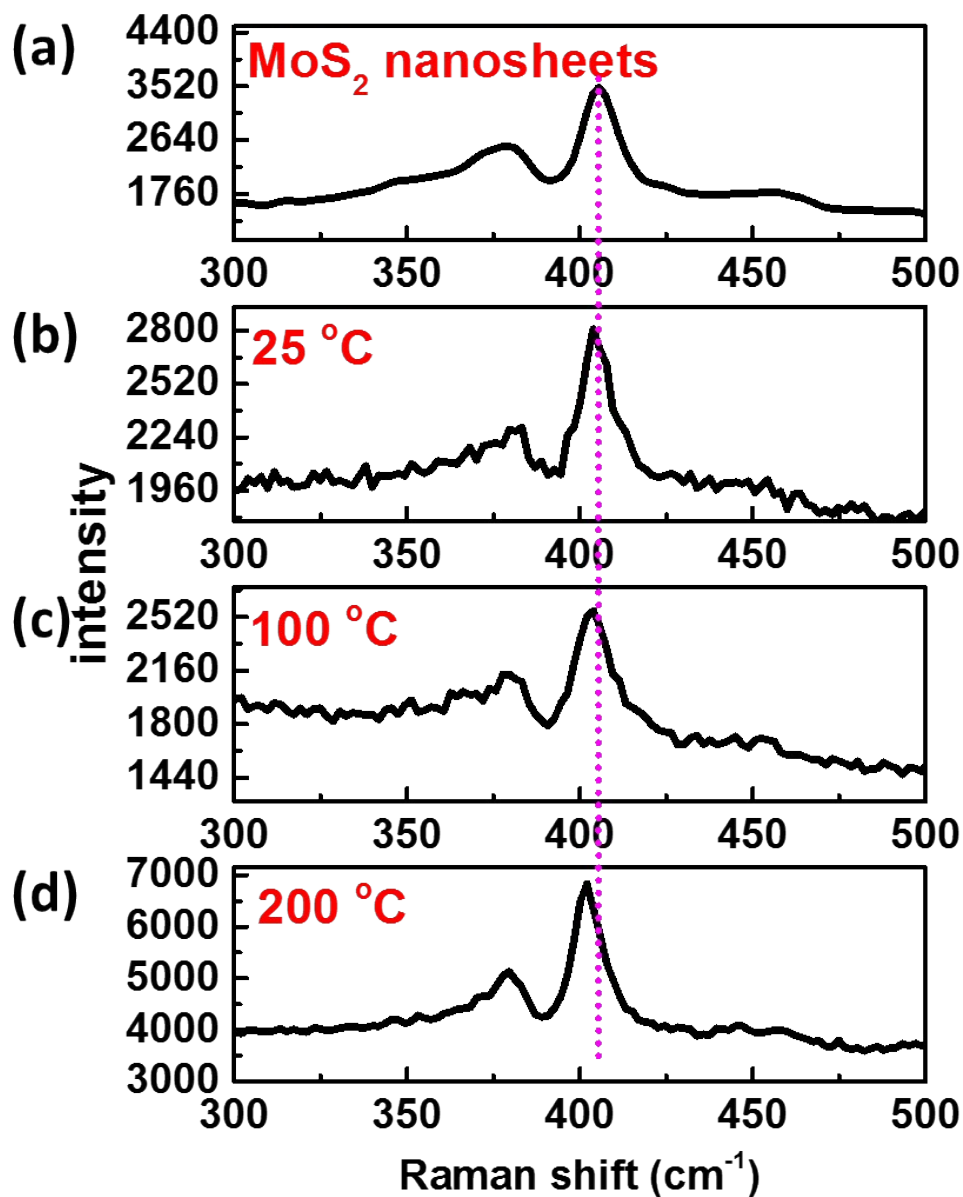

**Figure S16** Raman spectra of colloidal synthesized (a)  $\text{MoS}_{2-x}$  nanostructures, (b-d)  $\text{MoS}_1\text{Cu}_1$  with tetrakis(acetonitrile)copper (I) hexafluorophosphate decomposed at (b) 25 °C, (c) 100 °C, and (d) 200 °C. A1g peak position for synthesized  $\text{MoS}_2$  nanostructures is 405.80  $\text{cm}^{-1}$ . The peak position for tetrakis(acetonitrile)copper (I) hexafluorophosphate decomposed at 25 °C is 404.86  $\text{cm}^{-1}$ , at 100 °C is 403.90  $\text{cm}^{-1}$ , and at 200 °C is 402.40  $\text{cm}^{-1}$ . A total shift of 3.4  $\text{cm}^{-1}$  occurred upon Cu addition at 200 °C.

## SEM EDAX observation of synthesized nanoparticles

EDAX observation of  $\text{MoS}_{2-x}$  nanostructures

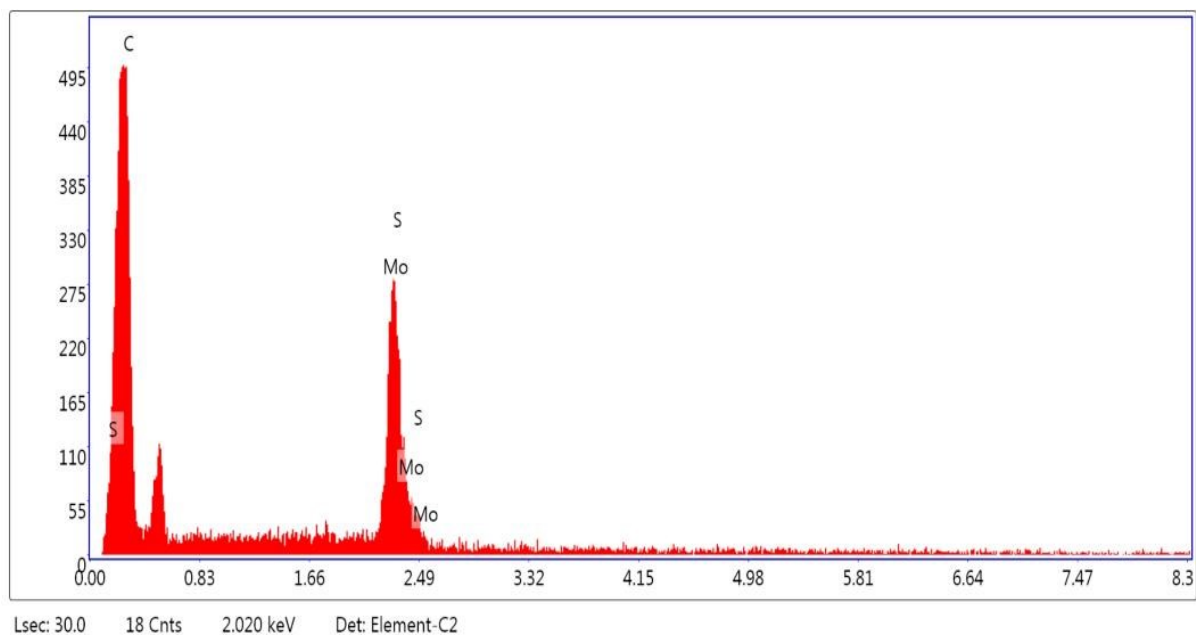

**Figure S17** EDAX analysis of  $\text{MoS}_{2-x}$  sample shows presence of Molybdenum and sulfur

## Formation of Cu doped $\text{MoS}$ at $100^\circ\text{C}$

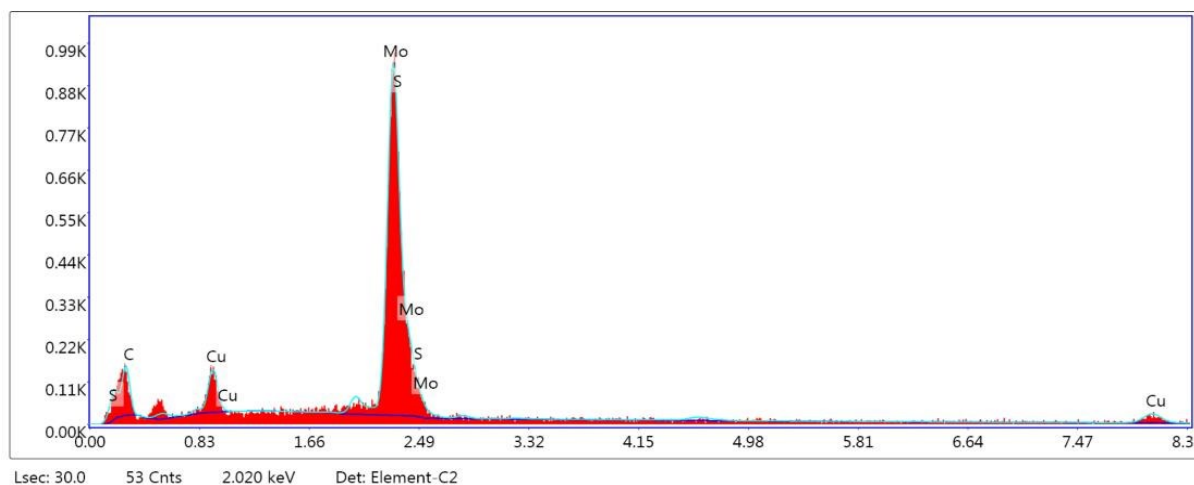

**Figure S18** EDAX analysis of Cu doped  $\text{MoS}_{2-x}$  synthesized at  $100^\circ\text{C}$  shows presence of Molybdenum, copper and sulfur

### Formation of CuS at 300°C

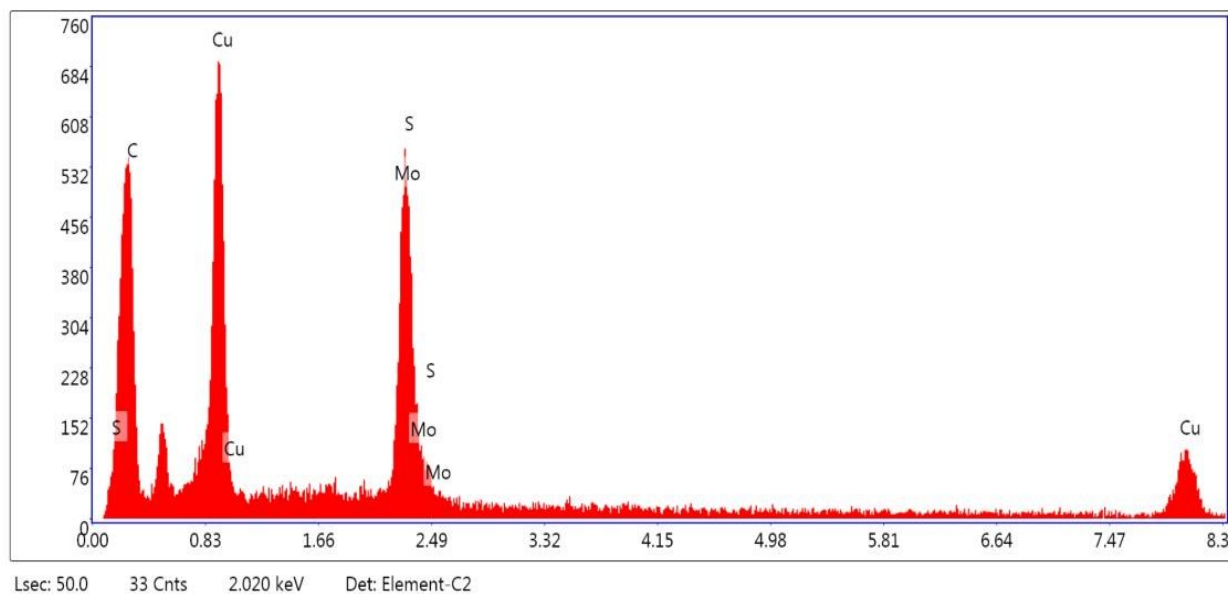

**Figure S19** EDAX analysis of Cu doped  $\text{MoS}_{2-x}$  synthesized at 300°C displays presence of Molybdenum, along with higher percentages of sulfur and copper.

PL studies of  $\text{MoS}_{1.99}\text{Cu}_{0.01}$  synthesized at different temperature

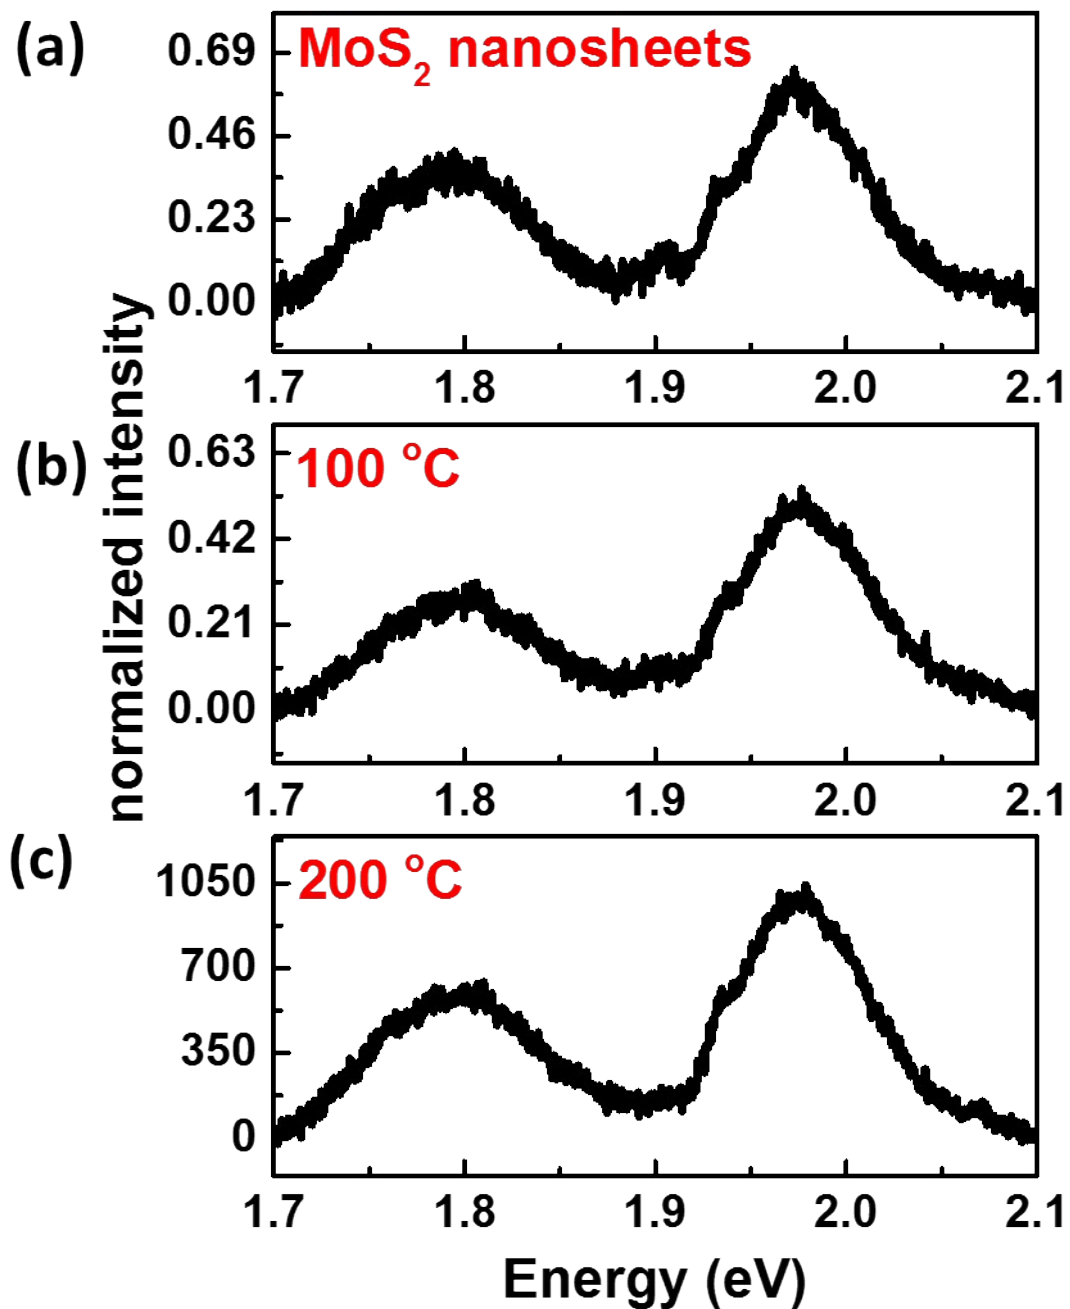

**Figure S20** PL spectra of (a) colloidal synthesized  $\text{MoS}_{2-x}$  and (b-c)  $\text{MoS}_{1.99}\text{Cu}_{0.01}$  with tetrakis(acetonitrile)copper (I) hexafluorophosphate decomposed at (b)  $100\text{ }^\circ\text{C}$ , and (c)  $200\text{ }^\circ\text{C}$ .

PL studies of  $\text{MoS}_{1.9}\text{Cu}_{0.1}$  synthesized at different temperature

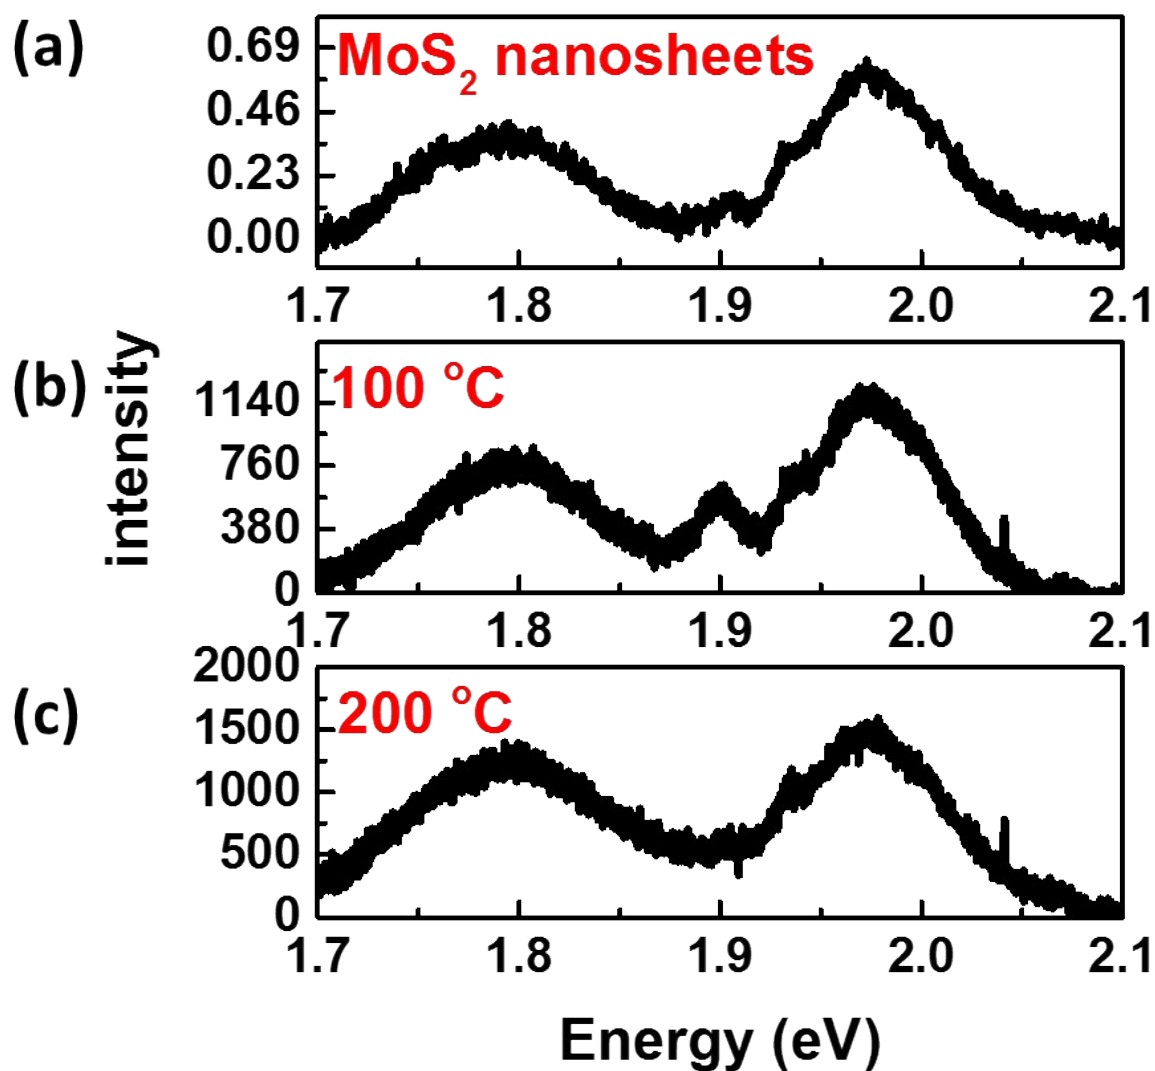

**Figure S21** PL spectra of (a) colloidal synthesized  $\text{MoS}_{2-x}$  and (b-d)  $\text{MoS}_{1.9}\text{Cu}_{0.1}$  with tetrakis(acetonitrile)copper (I) hexafluorophosphate decomposed at (b)  $100\text{ }^\circ\text{C}$ , and (c)  $200\text{ }^\circ\text{C}$ .

PL studies of  $\text{MoS}_1\text{Cu}_1$  synthesized at different temperature

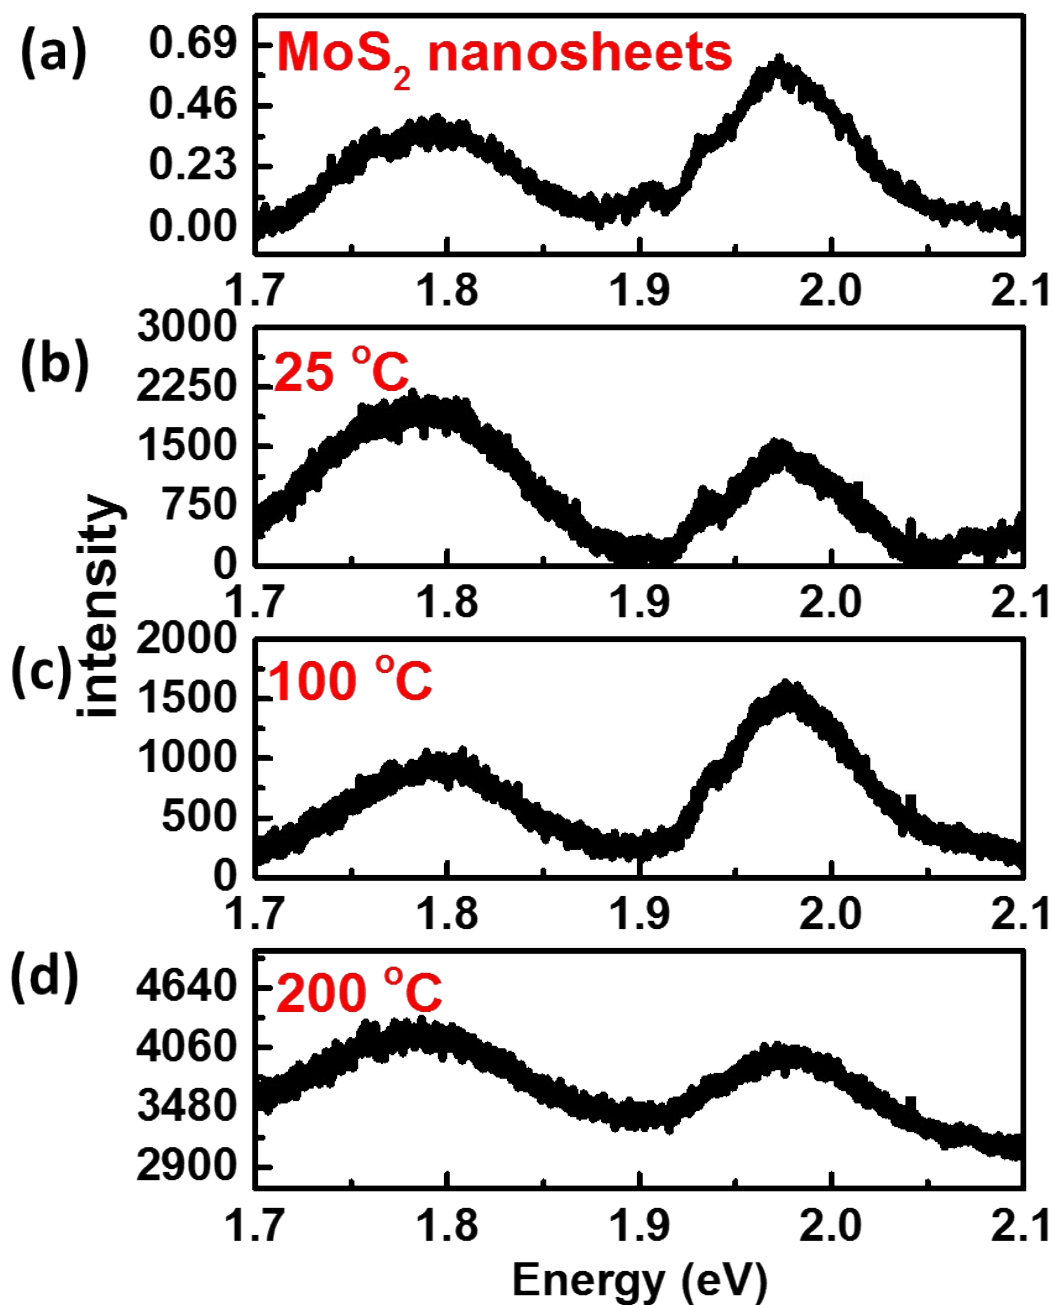

**Figure S22** PL spectra of colloidal synthesized (a)  $\text{MoS}_{2-x}$  nanostructures, (b-d)  $\text{MoS}_1\text{Cu}_1$  with tetrakis(acetonitrile)copper (I) hexafluorophosphate decomposed at (b)  $25\text{ }^\circ\text{C}$  (c)  $100\text{ }^\circ\text{C}$ , and (d)  $200\text{ }^\circ\text{C}$ .

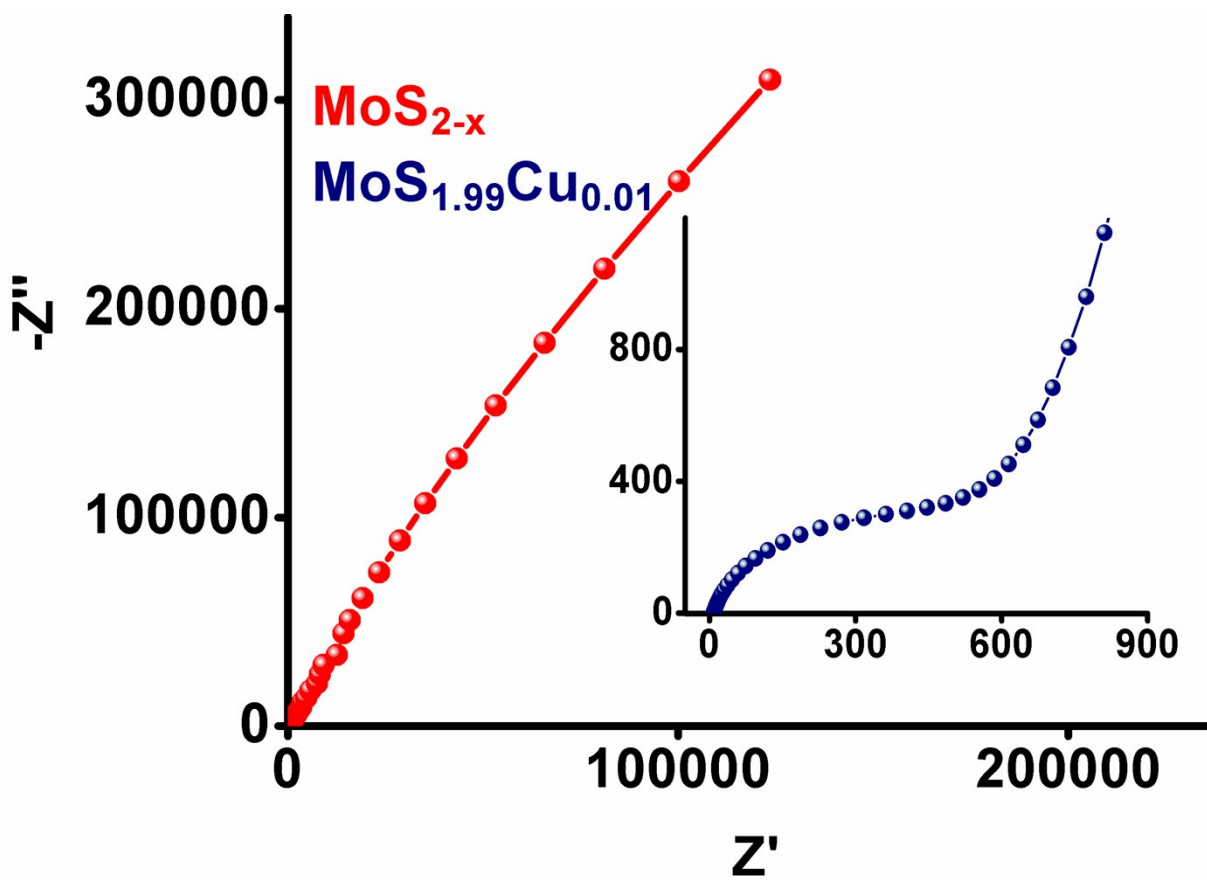

**Figure S23.** Nyquist plot of  $\text{MoS}_{2-x}$  and  $\text{MoS}_{1.99}\text{Cu}_{0.01}$

**Table S1** Molar ratio of copper oxide and molybdenum oxide to  $\text{MoS}_{2-x}\text{Cu}_x$  in the final product prepared under different reaction conditions.

| Sample                                     | Cu Decomposition Temp | CuO: MoO <sub>3</sub> : MoS <sub>2-x</sub> Cu <sub>x</sub> |
|--------------------------------------------|-----------------------|------------------------------------------------------------|
|                                            | (°C)                  | (molar ratio)                                              |
| <b>MoS<sub>2</sub> nanostructures</b>      | NA                    | 0: 0.44: 1                                                 |
| <b>MoS<sub>1.99</sub>Cu<sub>0.01</sub></b> | 100                   | 0: 0.75: 1                                                 |
| <b>MoS<sub>1.9</sub>Cu<sub>0.1</sub></b>   | 100                   | 0: 0.30: 1                                                 |
| <b>MoS<sub>1</sub>Cu<sub>1</sub></b>       | 100                   | 0.07: 0.56: 1                                              |
| <b>MoS<sub>1</sub>Cu<sub>1</sub></b>       | 200                   | 0.12: 0.57: 1                                              |

**Table S2** Recent reports on catalytic performance of heteroatom-doped MoS<sub>2</sub>-based catalysts

| <b>Dopant</b>    | <b>Doping concentration<br/>(atomic %)</b> | <b>Onset potential<br/>[ <math>\eta</math>, mV]</b>            | <b>Tafel slope<br/>(mV. dec<sup>-1</sup>)</b> | <b>Reference</b>        |
|------------------|--------------------------------------------|----------------------------------------------------------------|-----------------------------------------------|-------------------------|
| <b>Palladium</b> | 1                                          | -0.06                                                          | 62                                            | 1                       |
| <b>Zinc</b>      | 4.33                                       | -0.13                                                          | 51                                            | 2                       |
| <b>Copper</b>    | 8.71                                       | -0.16                                                          | 68                                            | 2                       |
| <b>Nickel</b>    | 10.45                                      | -0.19                                                          | 89                                            | 2                       |
| <b>Iron</b>      | 10.77                                      | -0.25                                                          | 148                                           | 2                       |
| <b>Cobalt</b>    | 10.94                                      | -0.24                                                          | 141                                           | 3                       |
| <b>Nitrogen</b>  | 41                                         | -0.3                                                           | 77                                            | 4                       |
| <b>Copper</b>    | <b>0.01</b>                                | <b>-0.26 (Initial cycle)<br/>-0.12 (After 1000<br/>cycles)</b> | <b>75</b>                                     | <b>Current<br/>work</b> |

## References

- 1) Zhaoyan Luo, Yixin Ouyang, Hao Zhang, Meiling Xiao, Junjie Ge, Zheng Jiang, Jinlan Wang, Daiming Tang, Xinzhong Cao, Changpeng Liu & Wei Xing, chemically activating MoS<sub>2</sub> via spontaneous atomic palladium interfacial doping towards efficient hydrogen evolution, Nat. Comm. 2018, 9, 2120 (1-8).
- 2) Yi Shi, Jiong Wang, Chen Wang, Ting-Ting Zhai, Wen-Jing Bao, Jing-Juan Xu, Xing-Hua Xia, and Hong-Yuan Chen, Hot Electron of Au Nanorods Activates the Electrocatalysis of Hydrogen Evolution on MoS<sub>2</sub> Nanosheets, J. Am. Chem. Soc. 2015, 137, 7365-7370.
- 3) Congrong Wang, Shun Wang, Jianguo Lv, Yuxuan Ma, Yongqi Wang, Gaoliang Zhou, Mingsheng Chen, Min Zhao, Xiaoshuang Chen, Lei Yang, Co doped MoS<sub>2</sub> as Bifunctional Electrocatalyst for Hydrogen Evolution and Oxygen Reduction Reactions, Int. J. Electrochem. Sci., 14 (2019) 9805-9814.
- 4) Qian Yang, Zegao Wang, Lichun Dong, Wenbin Zhao, Yan Jin, Liang Fang, Baoshan Hu, and Mingdong Dong, Activating MoS<sub>2</sub> with Super-High Nitrogen-Doping Concentration as, Efficient Catalyst for Hydrogen Evolution Reaction, J. Phys. Chem. C 2019, 123, 10917-10925
